# Supplementary material for: Removal of alleles by genome editing (RAGE) against deleterious load
Source: PubMed Central journal article supplement (PMC6472060; doi:10.1186/s12711-019-0456-8), 2019-04-17
Supplement: 12711_2019_456_MOESM1_ESM.pdf [file 12711_2019_456_MOESM1_ESM.pdf]

*Additional file 1. Mean and standard deviation of fitness, deleterious load, and number of segregating variants for codominant ( $h = 0.5$ ) and recessive ( $h = 0$ ) variants with 5000, 10 000, and 15 000 of fitness variants in the genome, breeding goal traits drawn from a gamma distribution rather than a normal distribution, a shorter historical breeding (10 generations of natural selection and 5 generations of historical breeding), a longer historical breeding (25 generations), or a simpler population history (constant effective population size of 100). The numbers are based on 10 replicates.*

Codominant variants

| Scenario         | Fitness | s.d. | Load  | s.d. | Segregating variants | s.d. |
|------------------|---------|------|-------|------|----------------------|------|
| 10000 variants   | 0.58    | 0.02 | 52.32 | 7.63 | 4444                 | 217  |
| 15000 variants   | 0.60    | 0.05 | 53.64 | 7.76 | 4730                 | 476  |
| 5000 variants    | 0.57    | 0.03 | 48.04 | 7.16 | 4347                 | 342  |
| gamma effects    | 0.58    | 0.03 | 52.35 | 8.40 | 4542                 | 271  |
| long historical  | 0.59    | 0.03 | 57.37 | 8.04 | 4534                 | 376  |
| short historical | 0.66    | 0.04 | 22.50 | 4.86 | 4966                 | 328  |
| simple history   | 0.56    | 0.06 | 50.85 | 7.20 | 4534                 | 564  |

Recessive variants

| Scenario         | Fitness | s.d. | Load   | s.d.  | Segregating variants | s.d. |
|------------------|---------|------|--------|-------|----------------------|------|
| 10000 variants   | 0.86    | 0.02 | 88.75  | 9.66  | 3634                 | 208  |
| 15000 variants   | 0.81    | 0.03 | 109.20 | 10.55 | 3222                 | 218  |
| 5000 variants    | 0.87    | 0.02 | 76.93  | 8.84  | 3727                 | 177  |
| gamma effects    | 0.82    | 0.04 | 96.50  | 10.76 | 3283                 | 350  |
| long historical  | 0.81    | 0.06 | 101.27 | 10.63 | 3351                 | 364  |
| short historical | 0.97    | 0.00 | 56.92  | 7.94  | 4631                 | 63   |
| simple history   | 0.88    | 0.02 | 78.12  | 9.55  | 3351                 | 314  |
