# Supplementary material for: Removal of alleles by genome editing (RAGE) against deleterious load
Source: PubMed Central journal article supplement (PMC6472060; doi:10.1186/s12711-019-0456-8), 2019-04-17

## Codominant

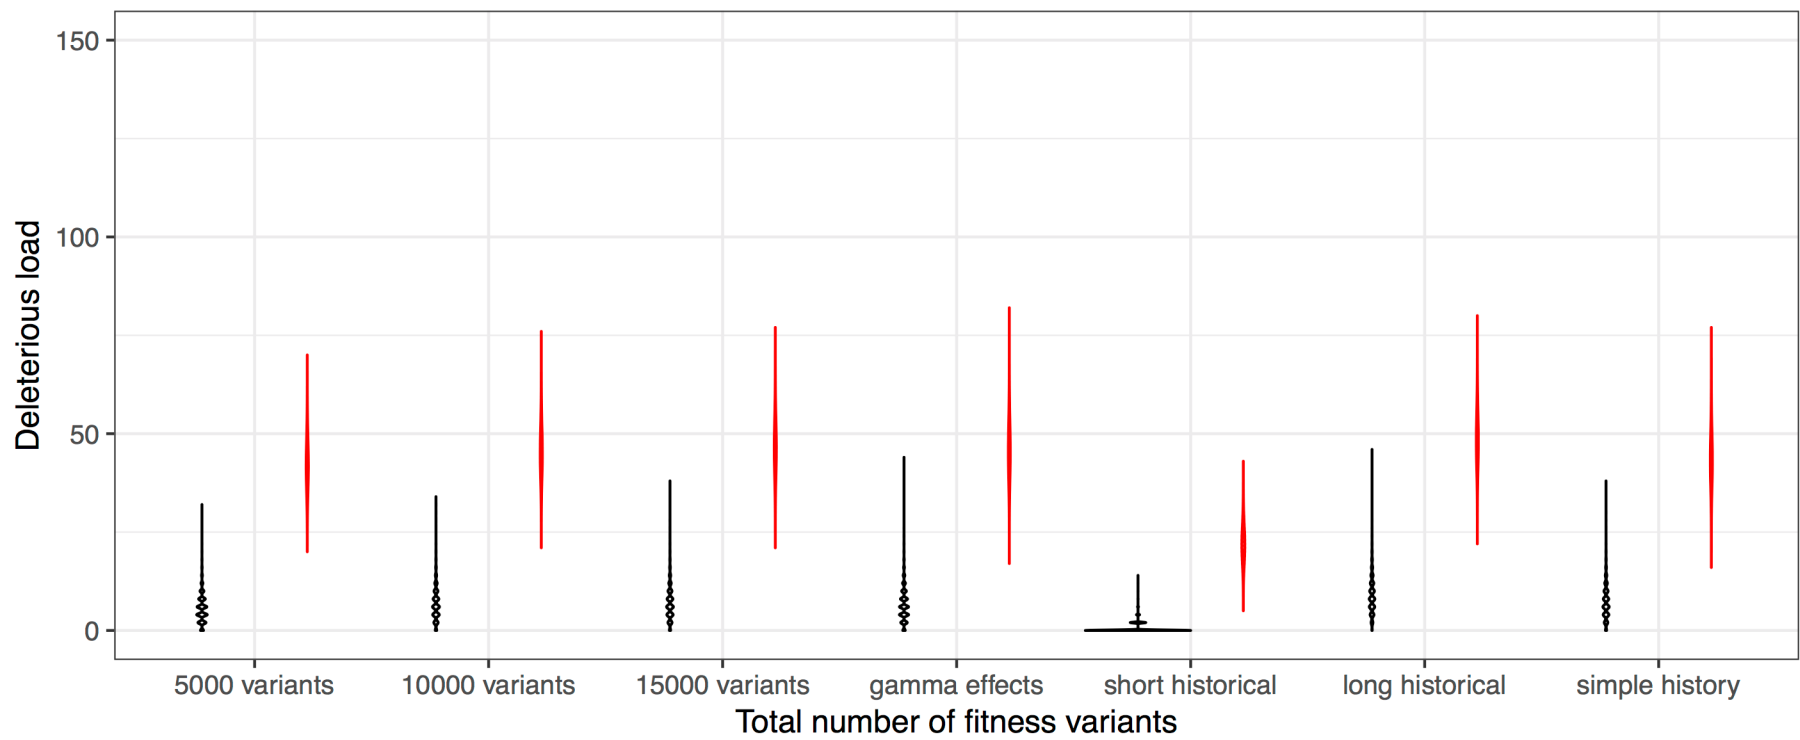

## Recessive

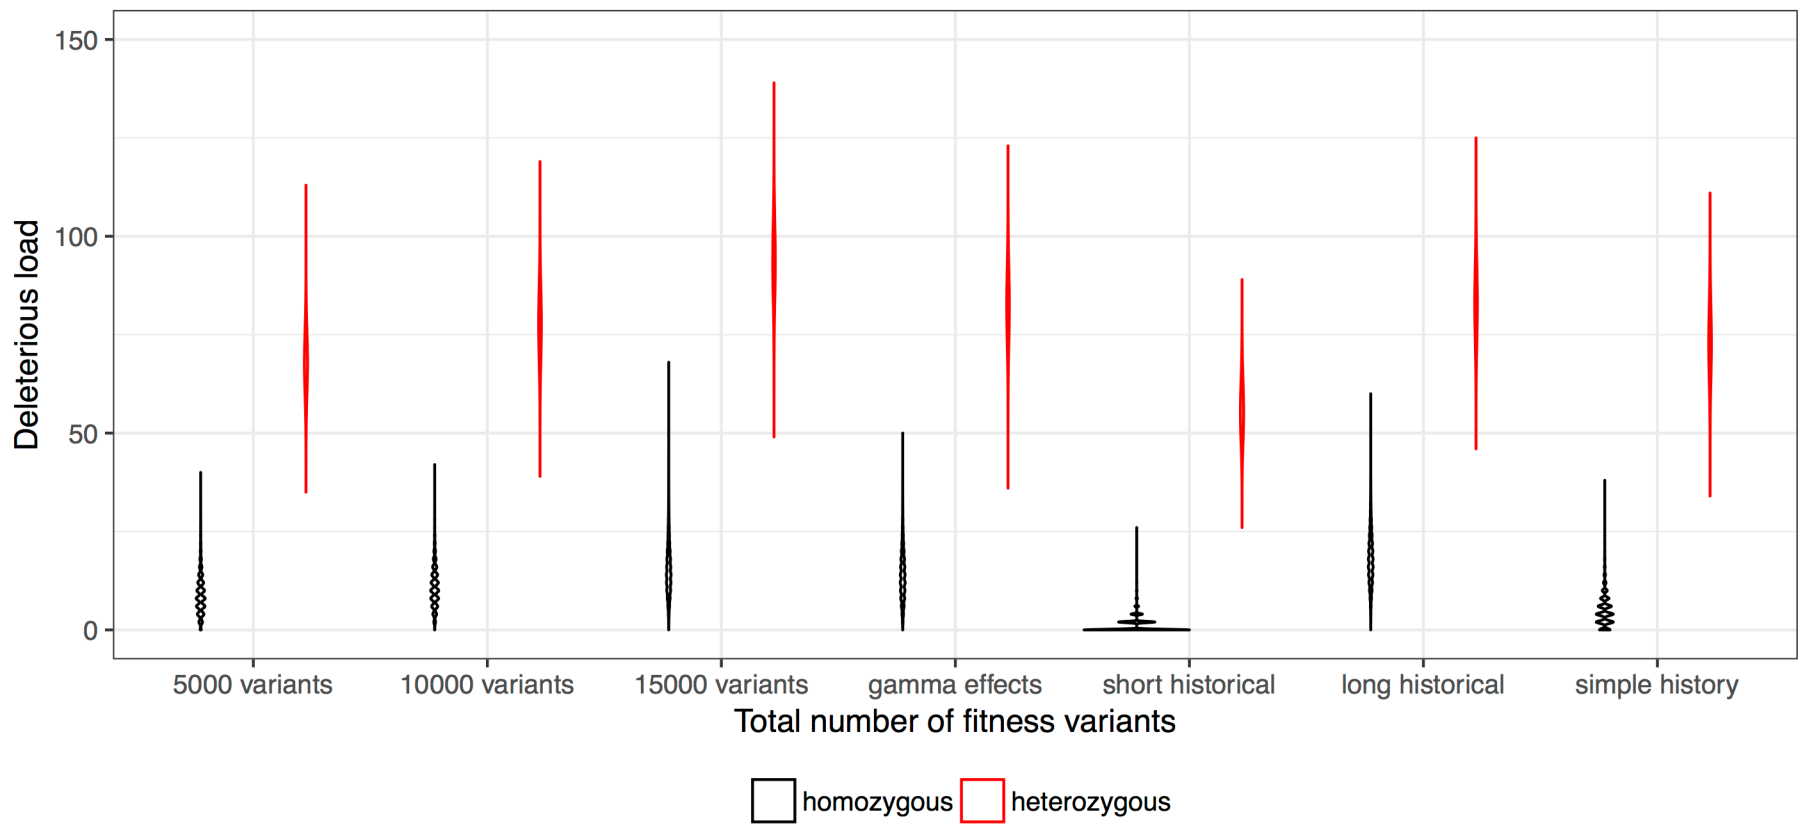

Supplement: 12711_2019_456_MOESM3_ESM.pdf [file 12711_2019_456_MOESM3_ESM.pdf]
